FALL 2022 | VOLUME 20 | NUMBER 4

# Focus

The Journal of Lifelong Learning in Psychiatry

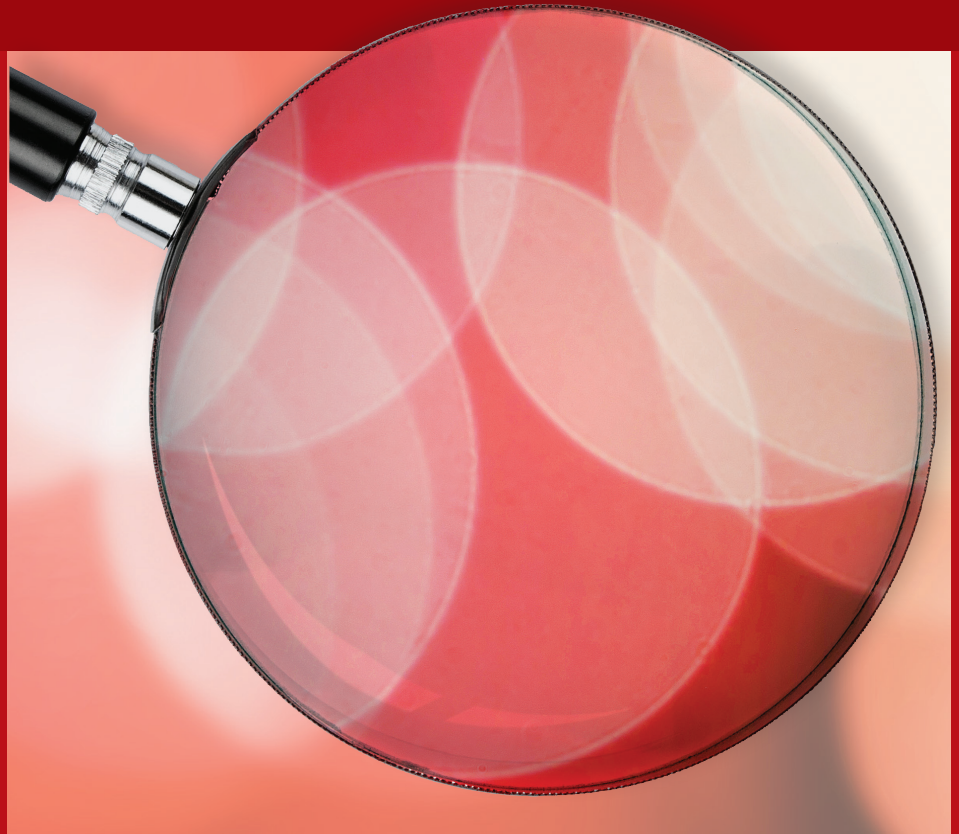

## Borderline and Other Personality Disorders: New Directions in 2022

Guest Editor: Lois W. Choi-Kain, M.D., M.Ed.

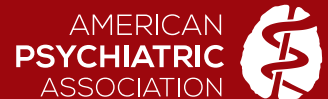

[focus.psychiatryonline.org](http://focus.psychiatryonline.org)
